# Supplementary material for: Historical snow and ice temperature observations document the recent warming of the Greenland ice sheet
Source: Copernicus journal article supplement (doi:10.5194/tc-2023-105), 2023-08-09
Supplement: Supplementary file 1 [file tc-2023-105-supplement.pdf]

## Supplementary material to:

# Historical snow and ice temperature observations document the recent warming of the Greenland ice sheet

Baptiste Vandecrux<sup>1</sup>, Robert S. Fausto<sup>1</sup>, Jason Box<sup>1</sup>, Federico Covi<sup>2</sup>, Regine Hock<sup>2, 3</sup>, Asa K. Rennermalm<sup>4</sup>, Achim Heilig<sup>5</sup>, Jakob Abermann<sup>6</sup>, Dirk van As<sup>1</sup>, Elisa Bjerre<sup>7</sup>, Xavier Fettweis<sup>8</sup>, Paul C.J.P. Smeets<sup>9</sup>, Peter Kuipers Munneke<sup>9</sup>, Michiel van den Broeke<sup>9</sup>, Max Brils<sup>9</sup>, Peter L. Langen<sup>10</sup>, Ruth Mottram<sup>11</sup>, Andreas Ahlstrøm<sup>1</sup>

<sup>1</sup>Geological Survey of Denmark and Greenland (GEUS), Department of Glaciology and Climate, Copenhagen, Denmark

<sup>2</sup>Geophysical Institute, University of Alaska Fairbanks, Fairbanks, AK, USA

<sup>3</sup>Department of Geoscience, University of Oslo, Oslo, Norway

<sup>4</sup>Department of Geography, Rutgers, the State University of New Jersey, Piscataway, NJ, USA

<sup>5</sup>Department of Earth and Environmental Sciences, Ludwig Maximilian University, Munich, Germany

<sup>6</sup>Department of Geography and Regional Sciences, University of Graz, Heinrichstraße 36, 8010, Graz, Austria

<sup>7</sup>Department of Geosciences and Natural Resource Management (IGN), University of Copenhagen (UCPH), Øster Voldgade 10, DK-1350 Copenhagen, Denmark

<sup>8</sup>Geography, University of Liège, Liège, Belgium

<sup>9</sup>Institute for Marine and Atmospheric Research, Utrecht University, Utrecht, the Netherlands

<sup>10</sup>Department of Environmental Science, iClimate, Aarhus University, Roskilde, Denmark

<sup>11</sup>Danish Meteorological Institute, Copenhagen, Denmark

*Correspondence to:* Baptiste Vandecrux ([bav@geus.dk](mailto:bav@geus.dk))

## Contents

|                             |   |
|-----------------------------|---|
| Supplementary figures ..... | 2 |
| Supplementary tables .....  | 4 |
| Supplementary text .....    | 5 |

## Supplementary figures

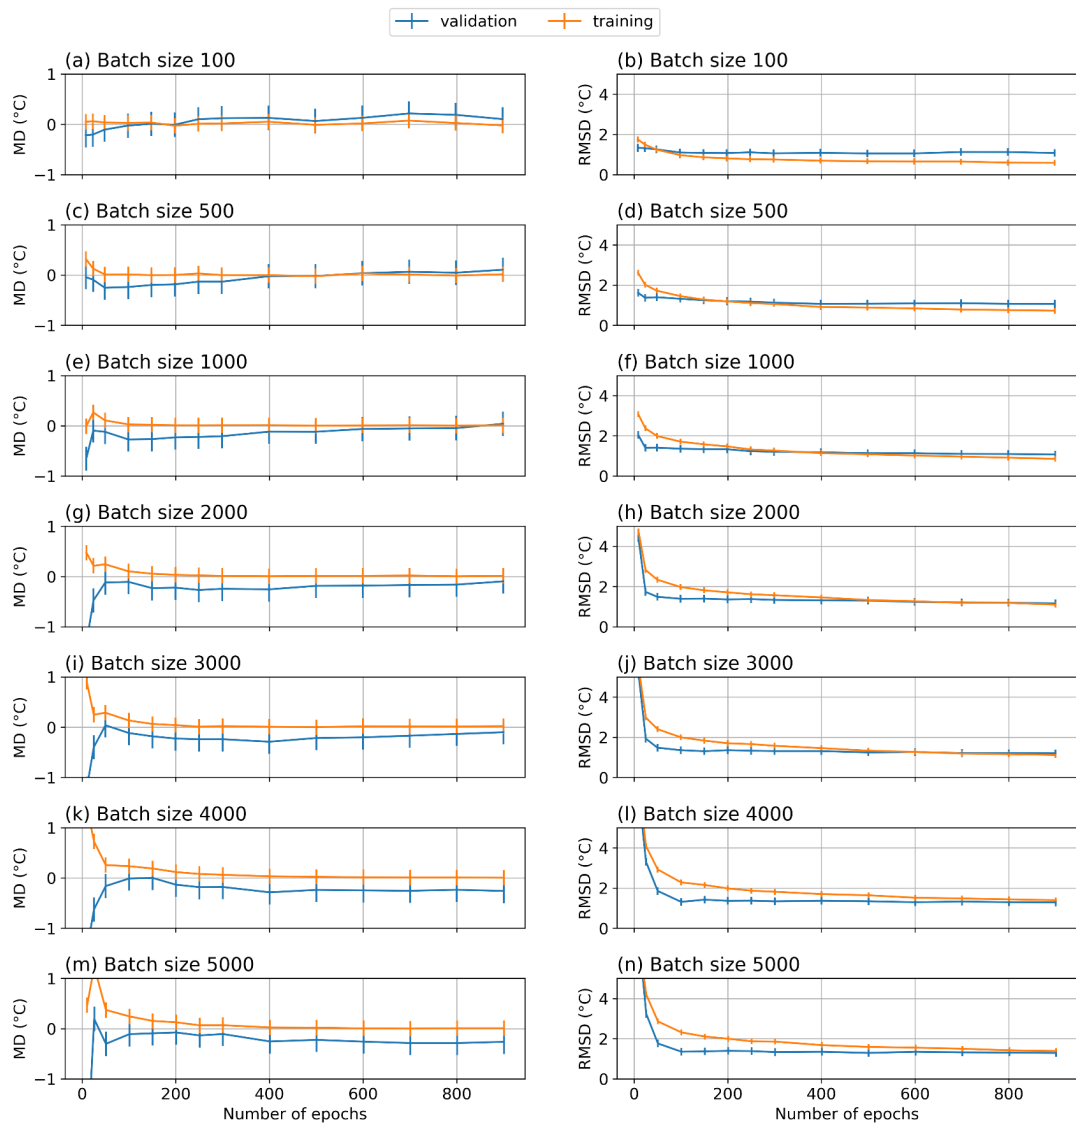

**Supplementary Figure 1. Mean difference (MD) and root mean squared difference (RMSD) between observed and predicted T10m for different ANN designs.**

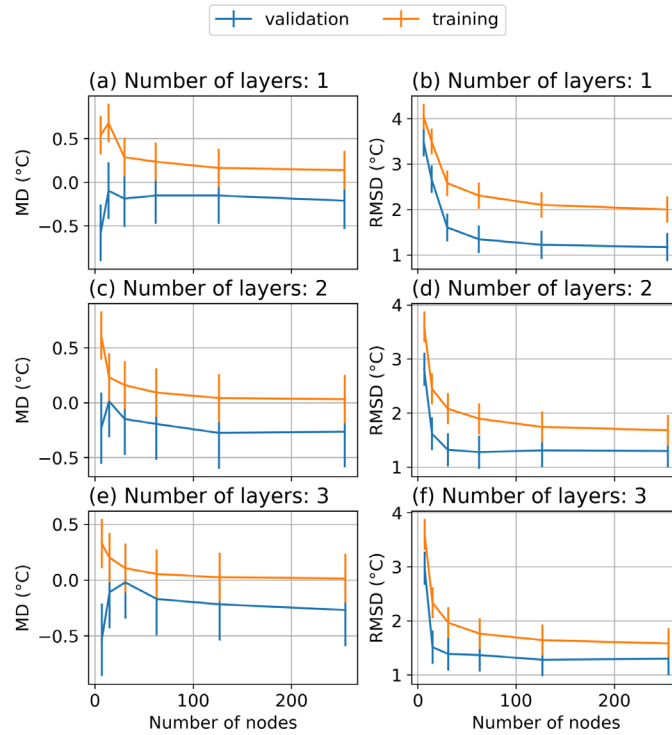

**Supplementary Figure 2. Mean difference (MD) and root mean squared difference (RMSD) between observed and predicted  $T_{10m}$  for different ANN designs.**

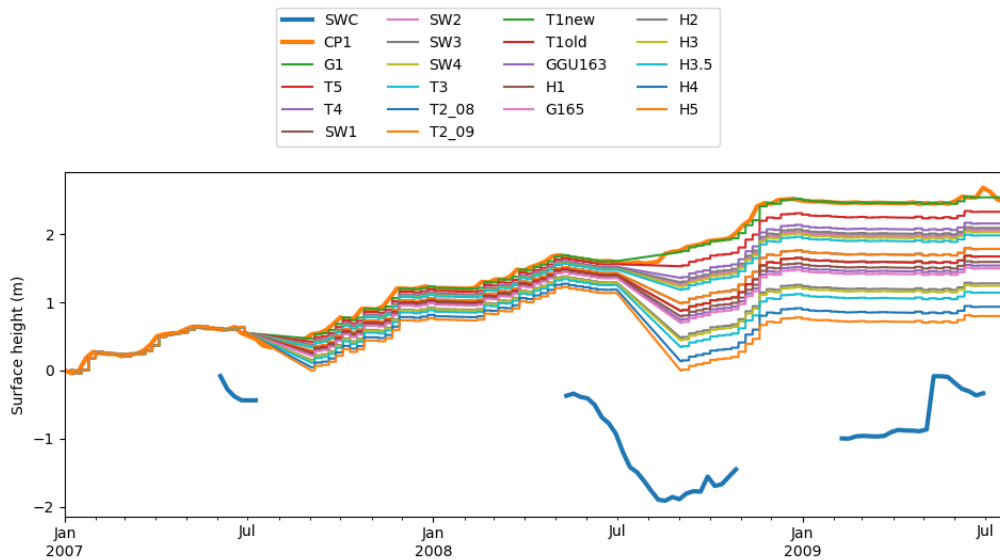

**Supplementary Figure 2. Reconstruction of surface height at the thermistor string locations from Humphrey et al. (2012) during the 2007-2009 period. The Crawford Point 1 (CP1) provides the snow accumulation for all sites, while the summer ablation is defined as a linear function of elevation between CP1 where no ablation is measured and Swiss Camp (SWC) where all the snow accumulated over the winter is considered to melt.**

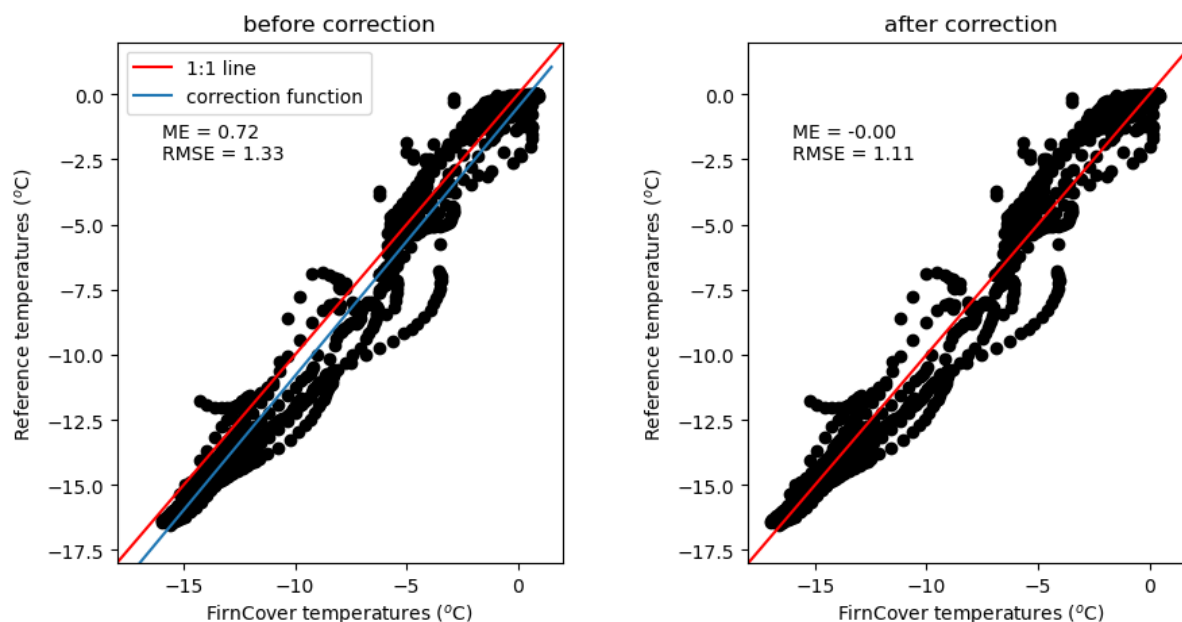

**Supplementary Figure 3. Bias correction in the FirnCover dataset. ME stands for mean error and RMSE for root mean squared error.**

## Supplementary tables

**Supplementary table 1. Uncertainty estimation that applies on the temperature measurements.**

| Site                 | Instrument 1 | Instrument 2            | Mean deviation | Root mean squared deviation |
|----------------------|--------------|-------------------------|----------------|-----------------------------|
| Summit               | GC-Net       | Giese and Hawley (2015) | -1.0           | 1.1                         |
| Camp Century         | PROMICE      | Camp Century Climate    | 0.1            | 0.3                         |
| Crawford Point       | GC-Net (CP1) | GC-Net (CP2)            | -0.2           | 0.3                         |
| Dye-2                | FirnCover    | Covi et al.             | 0.0            | 0.1                         |
| EKT                  | FirnCover    | Covi et al.             | 0.2            | 0.2                         |
| KAN_U                | FirnCover    | PROMICE                 | -0.4           | 0.5                         |
| (Hills et al., 2018) | T-15a        | T-14                    | -0.6           | 0.8                         |
| (Hills et al., 2018) | T-15b        | T-14                    | -0.4           | 0.6                         |
| (Hills et al., 2018) | T-15c        | T-14                    | -0.5           | 0.8                         |
| (Hills et al., 2018) | T-14         | T-16                    | 0.2            | 0.6                         |
| Median:              |              |                         |                | 0.5                         |

**Supplementary table 2. List of FirnCover sensors and their associated sensors in Samimi et al. (2021) and Heilig et al. (2018) at Dye-2.**

| FirnCover sensor | Corresponding sensors in |                      |
|------------------|--------------------------|----------------------|
|                  | Samimi et al. (2021)     | Heilig et al. (2018) |
| #2               | A3, B5                   | -                    |
| #3               | A4                       | #2                   |
| #4               | A5                       | -                    |
| #5               | -                        | #3                   |
| #7               | -                        | #4                   |

## Supplementary text

### Supplementary text 1: Estimation of the surface height for the Humphrey et al. (2012) dataset

The thermistor string installations from Humphrey et al. (2012) did not measure surface height. In an effort to produce the best interpolation of firn temperatures at 10 m depth, that takes into account the snow accumulation in the spring and the melt in the summer, we reconstruct the surface height at each site using the surface height measurements available at the Swiss Camp and CP1 GC-Net automated weather stations (Steffen et al., 1996, 2001, Vandecrux et al., 2023), respectively located at 1149 and 2022 m a.s.l. along the same elevation transect as the stations from Humphrey et al. (2012). While the data quality at Crawford point is good, the surface height at Swiss Camp only covers the 2008 ablation period. We therefore assume that all sites in Humphrey et al. (2012) have the same snow accumulation as Crawford Point and that the ablation that occurs between July and August is a linear function of elevation with no ablation at CP1 and total ablation of the accumulated snow at the lowest site H5 (Supplementary Figure 2). These surface heights are then used to estimate the depth of each sensor in the Humphrey et al. (2012) dataset before interpolation at 10 m depth.

### Supplementary text 2: Bias correction in the FirnCover data

The FirnCover dataset, presented by MacFerrin et al. (2022), consists of measurements of firn temperature at six sites from 2015 to 2019 using uncalibrated Resistance Temperature Detectors (RTD). After interpolation at 10 m and monthly averaging, it was noticed that there could be significant differences with measurements of firn temperatures at the same sites from Covi et al. (2022), Samimi et al. (2021) and Heilig et al. (2018).

We evaluate the bias in the FirnCover dataset at DYE-2, where measurements from Samimi et al. (2021) and Heilig et al. (2018) are used as reference. We identify, whenever possible, the FirnCover sensors that are located at similar depths as sensors from Samimi et al. (2021) and Heilig et al. (2018) (Supplementary Table 2). For instance, the FirnCover sensor #2 is located at the same depth (within 10 cm) as sensors A3 and B5 (third sensor on string A and fifth sensor on string B) from Samimi et al. (2021). The FirnCover measurements are on average

0.72°C higher (Supplementary Figure 3) than the measurements from Samimi et al. (2021) and Heilig et al. (2018) at similar depths. We fit a linear function of slope 1.031 and intercept -0.500 (Supplementary Figure 3) that is used to correct the FirnCover measurements. Applying this correction at other sites also improves comparison between the FirnCover measurements and observations from other sources, e.g. compared to PROMICE (Fausto et al., 2021) and SPLAZ (Charalampidis et al., 2016) data at KAN\_U or compared to Covi, et al. (2022) data at EKT.

Several factors can potentially explain the bias in the FirnCover measurements. Installation depths and estimated surface height were thoroughly checked and are unlikely to explain such a systematic bias. The FirnCover sensors did not go through calibration. However miscalibration would affect sensors randomly and would not be the same at all sites and for all sensors. Lastly, RTDs appeared, according to certain sources, to suffer from internal warming when installed in a poorly conductive media. (electronicdesign.com, 2000). Nevertheless, no information about this issue was available from the RTD manufacturer, nor about how to correct it. Therefore we henceforth use the empirically corrected FirnCover measurements as our best estimate of the true subsurface temperatures.

## References

Covi, F., Hock, R., Rennermalm, A., Leidman, S., Miede, C., Kingslake, J., Xiao, J., MacFerrin, M., Tedesco, M.: Meteorological and firn temperature data from three weather stations in the percolation zone of southwest Greenland, 2017 - 2019. Arctic Data Center, <https://doi.org/10.18739/A2BN9X444>, 2022.

Fausto, R. S., van As, D., Mankoff, K. D., Vandecrux, B., Citterio, M., Ahlstrøm, A. P., Andersen, S. B., Colgan, W., Karlsson, N. B., Kjeldsen, K. K., Korsgaard, N. J., Larsen, S. H., Nielsen, S., Pedersen, A. Ø., Shields, C. L., Solgaard, A. M., and Box, J. E.: Programme for Monitoring of the Greenland Ice Sheet (PROMICE) automatic weather station data, *Earth Syst. Sci. Data*, 13, 3819–3845, <https://doi.org/10.5194/essd-13-3819-2021>, 2021.

Heilig, A., Eisen, O., MacFerrin, M., Tedesco, M., and Fettweis, X.: Seasonal monitoring of melt and accumulation within the deep percolation zone of the GrIS and comparison with simulations of regional climate modeling, *The Cryosphere*, 12, 1851–1866, <https://doi.org/10.5194/tc-12-1851-2018>, 2018.

MacFerrin, M. J., Stevens, C. M., Vandecrux, B., Waddington, E. D., and Abdalati, W.: The Greenland Firn Compaction Verification and Reconnaissance (FirnCover) dataset, 2013–2019, *Earth Syst. Sci. Data*, 14, 955–971, <https://doi.org/10.5194/essd-14-955-2022>, 2022.

Murphy, M., Eliminate RTD self-heating errors. *electronicdesign.com*. Web Page. <https://www.electronicdesign.com/technologies/embedded-revolution/article/21771669/eliminate-rtd-selfheating-errors>, last accessed: 23-01-2022. 2000.

Steffen, K., Box, J., Abdalati, W. : Greenland Climate Network: GC-Net, in *Glaciers, Ice Sheets and Volcanoes: A Tribute to Mark F. Meier*, S, Ed.: C. Colbeck, Special Report, Cold Regions Research and Engineering Laboratory, 1996.

Steffen, K., and Box, J.: Surface climatology of the Greenland ice sheet: Greenland Climate Network 1995–1999, *J. Geophys. Res.*, 106( D24), 33951– 33964, <https://doi.org/10.1029/2001JD900161>, 2001.

Vandecrux, B., Box, J. E., Ahlstrøm, A. P., Andersen, S. B., Bayou, N., Colgan, W. T., Cullen, N. J., Fausto, R. S., Haas-Artho, D., Heilig, A., Houtz, D. A., How, P., Iosifescu Enescu, I., Karlsson, N. B., Kurup Buchholz, R., Mankoff, K. D., McGrath, D., Molotch, N. P., Perren, B., Revheim, M. K., Rutishauser, A., Sampson, K., Schneebeli, M., Starkweather, S., Steffen, S., Weber, J., Wright, P. J., Zwally, H. J., and Steffen, K.: The historical Greenland Climate Network (GC-Net) curated and augmented Level 1 dataset, *Earth Syst. Sci. Data Discuss.* [preprint], <https://doi.org/10.5194/essd-2023-147>, in review, 2023.
